# Supplementary material for: Hippocampal activation is associated with longitudinal amyloid accumulation and cognitive decline
Source: eLife. 2017 Feb 8;6:e22978. doi: 10.7554/eLife.22978 (PMC5325620; doi:10.7554/eLife.22978)
Supplement: Figure 1—source data 1. — DOI: http://dx.doi.org/10.7554/eLife.22978.005 [file elife-22978-fig1-data1.xlsx]

## Sheet: Sheet1
Subject	R Hippocampal activation	PIB1	PIB2	PIB3	PIBSlope	APOE4 (1=+)	Age (at fMRI)	Education	MMSE (Baseline)	Sex (1=F)	Non-hippocampal activation	CVLT LD FR 1	CVLT LD FR 2	CVLT LD FR 3	CVLTSlope
1	22.2778	1.568	1.7579		0.0410382	1	75.6906	20	29	0	15.1147	15	16	13	-0.263722
2	-32.2843	1.0358	1.0075		-0.00599507	0	71.436	18	30	1	1.0638	11	16	7	-0.971821
3	9.94686	0.96517	0.97989		0.00311647	0	67.6359	18	30	0	0.845023	15	14	12	-0.637236
4	16.3669	1.0677	1.0317		-0.0114961	0	71.3183	14	30	1	21.018	11	10	15	1.07885
5	-7.96694	0.96473	0.95869		-0.00154492	0	82.7023	18	30	0	0.0118755	12	14	7	-1.2113
6	5.37674	0.98792	0.99983		0.00321773	0	69.3279	18	29	1	-4.85413	8	11	10	0.501371
7	26.0599	1.0495	0.97163	1.0804	0.00440238	1	81.18	20	30	1	-0.319927	13	13	14	0.501833
8	34.0601	1.0168	1.0668	1.2555	0.0306994	0	75.718	18	30	1	20.7673	12	14	12	0.00815163
9	16.2282	0.97595	0.96257		-0.00465558	1	91.0992	16	29	0	11.0744	14	15	15	0.495796
10	-7.0443	1.0228	1.0269		0.0014515	0	78.7953	18	30	1	11.2771	7	9	9	0.96817
11	6.56019	1.0358	1.0389	1.0802	0.00598648	1	71.7043	16	30	0	11.5729	12	9	15	0.719158
12	15.4379	0.97817	1.0012		0.00779773	1	75.6386	20	29	0	3.20163	14	14	16	0.98336
13	6.09079	1.0094	1.0306	0.97066	-0.00540658	0	77.2649	20	29	0	-0.0279195	11	14	12	0.500375
14	-11.4075	0.91356	0.96628		0.0238449	0	75.1978	18	30	0	-2.46212	11	11	10	-0.236991
15	0.724676	0.97044	1.0104		0.0180067	0	75.2799	18	28	0	19.6878	10	11	11	0.501374
16	-10.7872	1.0651	1.0349	1.0329	-0.00390589	0	72.7967	18	27	0	-6.2814	8	12	12	1.42134
17	2.97746	1.6008	1.636	1.6681	0.00960326	1	82.7981	15	29	0	11.3021	12	12	14	0.993715
18	27.6842	1.3875	1.6491		0.0397684	1	70.5763	16	30	0	10.3956	16	13	14	-0.472604
19	15.4126	1.3628	1.4879		0.0419298	0	77.4018	16	29	0	-0.860889	6	9	6	-0.0106069
20	-13.4466	1.0881	0.91144	1.018	-0.0158521	0	73.1526	18	29	0	4.56837	15	16	16	0.459652
21	9.94855	1.0096	0.98146		-0.0073	1	80.8515	16	29	1	4.57769	7	8	12	2.45824
22	-5.55025	0.98313	1.0501		0.0237321	0	74.0315	17	29	0	7.52635	12	12	10	-0.558575
23	15.435	1.2412	1.4019		0.0507401	1	76.0465	14	30	0	4.70838	15	16	13	-0.922788
24	0.015234	0.97543	1.0157		0.0134356	0	81.7139	16	30	0	-5.98912	14	13	15	0.491508
25	6.15175	0.96957	0.95418	0.97254	0.000217513	0	88.5969	20	28	1	18.5287	5	9	7	1.0213
26	-2.30567	1.0357	0.99336		-0.0110308	0	71.31	17	29	0	15.247	15	15	16	0.251366
27	26.1796	1.0588	1.0498		-0.00220027	0	76.07	16	27	0	17.531	11	12	13	0.993167
